# Supplementary material
Source: Springer Nature journal article supplement (https://www.springermedizin.de/resource/supplementary/13054_2013_2977_MOESM2_ESM.pdf/9712296)
Supplement: MOESM2 [file 9712296]

| QUADAS Items                                                                                                                                                                                  | Donmez <sup>11</sup> | Abbasi <sup>12</sup> | Hyacinthe <sup>13</sup> | Nandipati <sup>14</sup>                  | Nagarsheth <sup>15</sup>                      | Xirouchaki <sup>16</sup> |
|-----------------------------------------------------------------------------------------------------------------------------------------------------------------------------------------------|----------------------|----------------------|-------------------------|------------------------------------------|-----------------------------------------------|--------------------------|
| 1) Was the spectrum of patients representative of the patients who will receive the test in practice? (spectrum composition)                                                                  | Y                    | Y                    | Y                       | Y                                        | Y                                             | Y                        |
| 2) Were selection criteria clearly described? (selection criteria)                                                                                                                            | Y                    | Y                    | Y                       | Y                                        | Y                                             | Y                        |
| 3) <i>Is the reference standard likely to correctly classify the target condition? (reference standard)</i>                                                                                   | Y                    | Y                    | Y                       | Y                                        | Y                                             | Y                        |
| 4) Is the time period between reference standard and index test short enough to be reasonably sure that the target condition did not change between the two tests? (disease progression bias) | Y                    | U                    | Y                       | Y                                        | U                                             | Y                        |
| 5) Did the whole sample or a random selection of the sample, receive verification using a reference standard of diagnosis? (partial verification)                                             | Y                    | Y                    | Y                       | Y                                        | Y                                             | Y                        |
| 6) Did patients receive the same reference standard regardless of the index test result? (differential verification)                                                                          | Y                    | Y                    | Y                       | Y                                        | Y                                             | Y                        |
| 7) Was the reference standard independent of the index test (i.e. the index test did not form part of the reference standard)? (incorporation bias)                                           | Y                    | Y                    | Y                       | Y                                        | Y                                             | Y                        |
| 8) Was the execution of the index test described in sufficient detail to permit replication of the test? (index test execution)                                                               | Y                    | Y                    | Y                       | Y (only one intercostals space examined) | Y                                             | Y                        |
| 9) Was the execution of the reference standard described in sufficient detail to permit its replication? (reference standard execution)                                                       | Y                    | Y                    | Y                       | Y                                        | Y                                             | Y                        |
| 10) Were the index test results interpreted without knowledge of the results of the reference standard? (test review bias)                                                                    | Y                    | Y                    | Y                       | Y                                        | Y (confirmed with direct email communication) | Y                        |
| 11) Were the reference standard results interpreted without knowledge of the results of the index test? (reference standard review bias)                                                      | Y                    | Y                    | Y                       | Y                                        | Y                                             | Y                        |
| 12) Were the same clinical data available when test results were interpreted as would be available when the test is used in practice? (clinical review bias)                                  | Y                    | Y                    | Y                       | Y                                        | Y                                             | Y                        |
| 13) Were uninterpretable/ intermediate test results reported? (uninterpretable test results)                                                                                                  | U                    | Y                    | Y                       | Y                                        | Y                                             | Y                        |
| 14) Were withdrawals from the study explained? (withdrawals)                                                                                                                                  | Y                    | Y                    | Y                       | Y                                        | U                                             | Y                        |

| QUADAS Items                                                                                                                                                                                  | Brook <sup>17</sup> | Soldati <sup>18</sup> | Soldati <sup>19</sup> | Zhang <sup>20</sup> | Chung <sup>21</sup> | Kirkpatrick <sup>22</sup>           | Rowan <sup>23</sup> |
|-----------------------------------------------------------------------------------------------------------------------------------------------------------------------------------------------|---------------------|-----------------------|-----------------------|---------------------|---------------------|-------------------------------------|---------------------|
| 1) Was the spectrum of patients representative of the patients who will receive the test in practice? (spectrum composition)                                                                  | Y                   | Y                     | Y                     | Y                   | Y                   | Y                                   | U                   |
| 2) Were selection criteria clearly described? (selection criteria)                                                                                                                            | Y                   | Y                     | Y                     | Y                   | Y                   | Y                                   | Y                   |
| 3) <i>Is the reference standard likely to correctly classify the target condition? (reference standard)</i>                                                                                   | Y                   | Y                     | Y                     | Y                   | Y                   | Y                                   | Y                   |
| 4) Is the time period between reference standard and index test short enough to be reasonably sure that the target condition did not change between the two tests? (disease progression bias) | Y                   | Y                     | Y                     | Y                   | Y                   | Y                                   | Y                   |
| 5) Did the whole sample or a random selection of the sample, receive verification using a reference standard of diagnosis? (partial verification)                                             | Y                   | Y                     | Y                     | Y                   | Y                   | Y                                   | Y                   |
| 6) Did patients receive the same reference standard regardless of the index test result? (differential verification)                                                                          | Y                   | Y                     | Y                     | Y                   | Y                   | N We included only pt with CT scans | Y                   |
| 7) Was the reference standard independent of the index test (i.e. the index test did not form part of the reference standard)? (incorporation bias)                                           | Y                   | Y                     | Y                     | Y                   | Y                   | Y                                   | Y                   |
| 8) Was the execution of the index test described in sufficient detail to permit replication of the test? (index test execution)                                                               | Y                   | Y                     | Y                     | Y                   | Y                   | Y                                   | Y                   |
| 9) Was the execution of the reference standard described in sufficient detail to permit its replication? (reference standard execution)                                                       | Y                   | Y                     | Y                     | Y                   | Y                   | Y                                   | Y                   |
| 10) Were the index test results interpreted without knowledge of the results of the reference standard? (test review bias)                                                                    | Y                   | Y                     | Y                     | Y                   | Y                   | Y                                   | Y                   |
| 11) Were the reference standard results interpreted without knowledge of the results of the index test? (reference standard review bias)                                                      | Y                   | Y                     | Y                     | Y                   | Y                   | U                                   | Y                   |
| 12) Were the same clinical data available when test results were interpreted as would be available when the test is used in practice? (clinical review bias)                                  | Y                   | Y                     | Y                     | Y                   | Y                   | Y                                   | Y                   |
| 13) Were uninterpretable/ intermediate test results reported? (uninterpretable test results)                                                                                                  | Y                   | Y                     | Y                     | Y                   | Y                   | Y                                   | Y                   |
| 14) Were withdrawals from the study explained? (withdrawals)                                                                                                                                  | Y                   | U                     | Y                     | Y                   | Y                   | Y                                   | Y                   |

Yes=Y, No=N, Unclear=U.
